# Supplementary material
Source: Springer Nature journal article supplement (https://www.springermedizin.de/resource/supplementary/12955_2007_446_MOESM3_ESM.pdf/9560470)

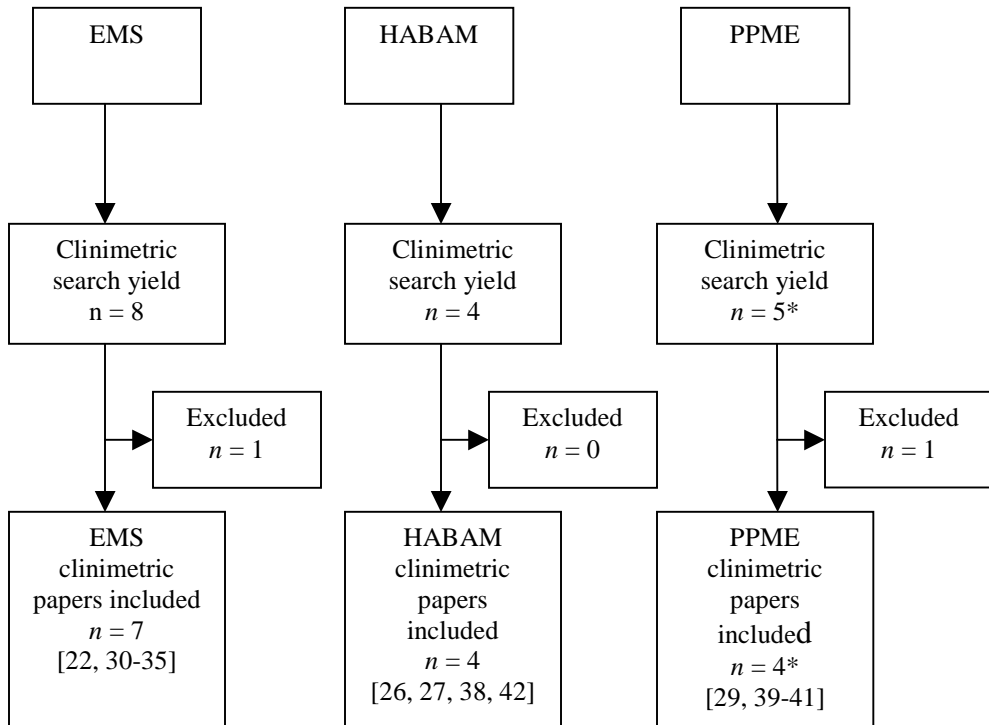

\* one paper identified from the HABAM search yield [41]

Supplement: MOESM3 [file 9560470]
